# Supplementary material for: RICTOR amplification identifies a subgroup in small cell lung cancer and predicts response to drugs targeting mTOR
Source: PubMed Central journal article supplement (PMC5351607; doi:10.18632/oncotarget.13362), 2016-11-15
Supplement: oncotarget-08-5992-s001.pdf [file oncotarget-08-5992-s001.pdf]

# RICTOR amplification identifies a subgroup in small cell lung cancer and predicts response to drugs targeting mTOR

## SUPPLEMENTARY FIGURES AND TABLE

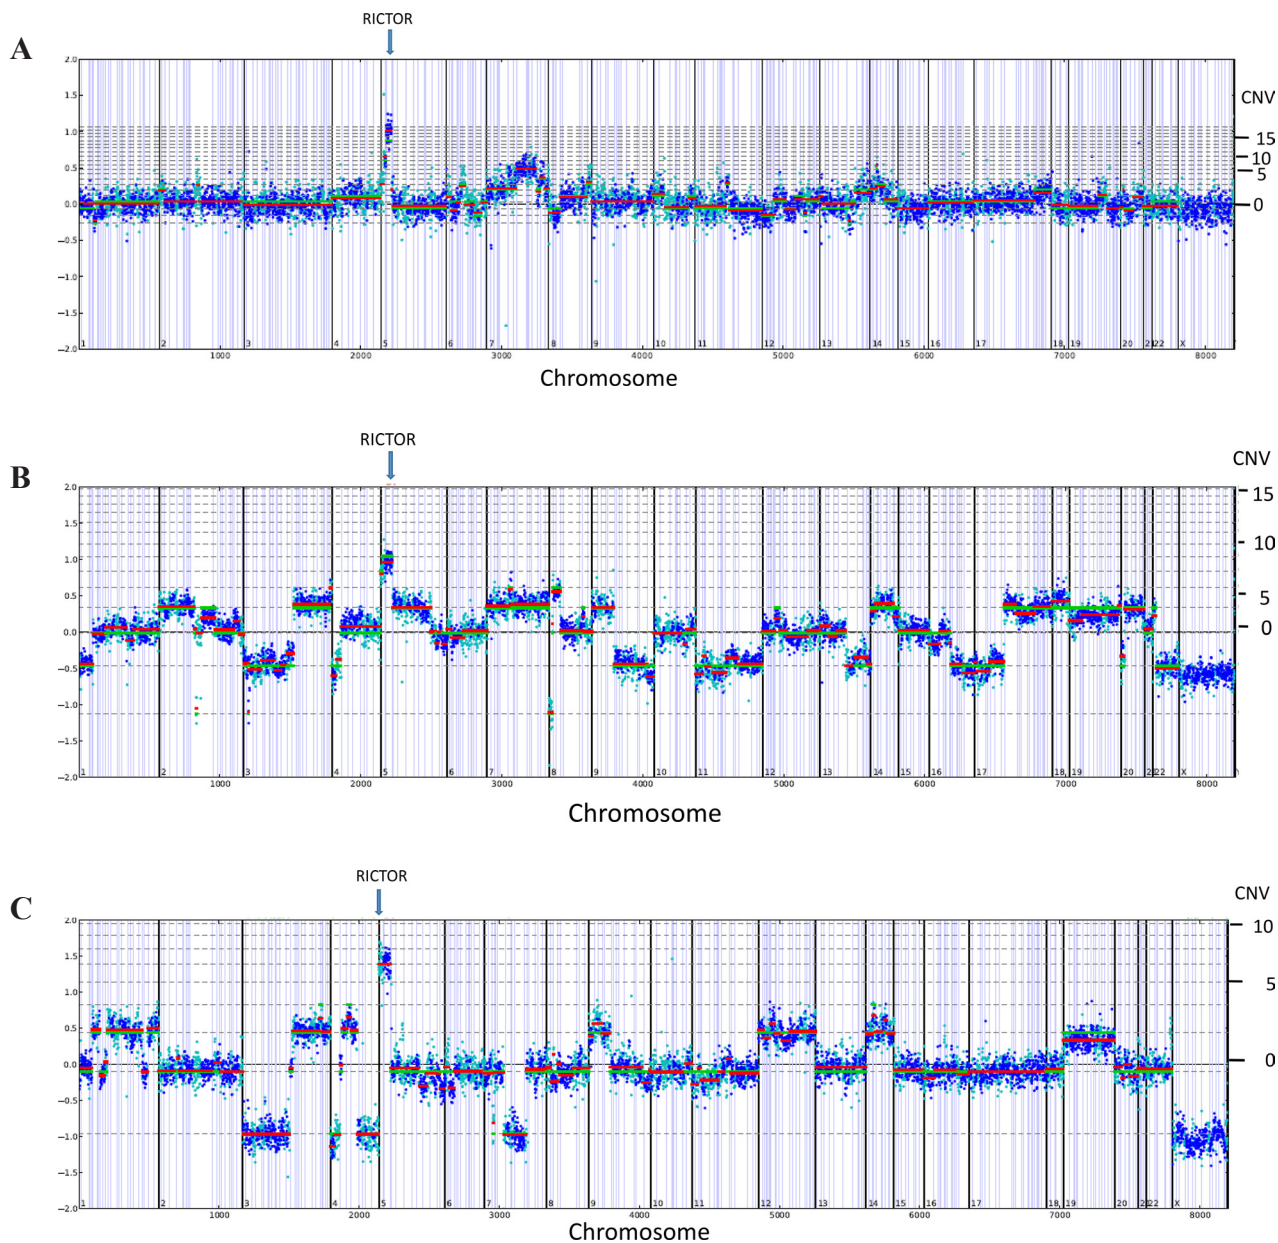

**Supplementary Figure 1:** **A.** CNV plot of a SCLC tumor sample with amplification of the *RICTOR* gene at 18 copies on 5p13. The chromosomal location is provided on the X-axis and the gene copy number on the Y-axis. **B.** CNV plot of a SCLC tumor sample with amplification of the *RICTOR* gene at 7 copies on 5p13. The chromosomal location is provided on the X-axis and the gene copy number on the Y-axis. **C.** CNV plot of a SCLC tumor sample with amplification of the *RICTOR* gene at 6 copies on 5p13. The chromosomal location is provided on the X-axis and the gene copy number on the Y-axis.

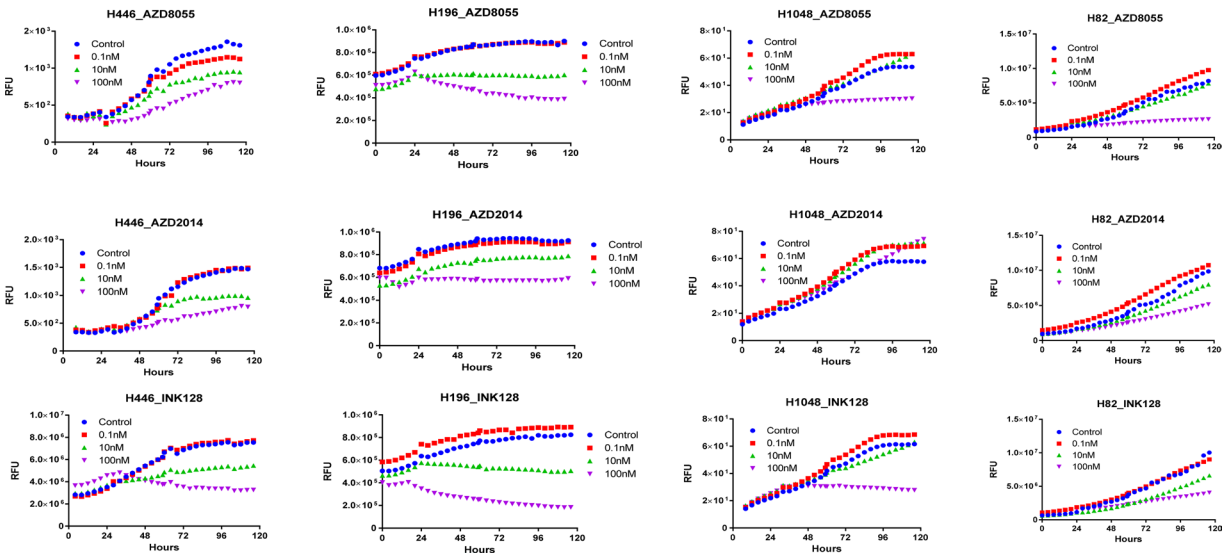

Supplementary Figure 2: The effect of mTORC inhibitors (AZD8055, AZD2014, INK128) on cell proliferation in two SCLC cell lines with *RICTOR* CN gain (H446, H196) and two with no gain in *RICTOR* CN (H1048, H82) were studied.

**Supplementary Table: 1: List of genes demonstrating amplification in SCLC patient tumors**

See Supplementary File 1.
